# Supplementary material for: TFEB Overexpression, Not mTOR Inhibition, Ameliorates RagCS75Y Cardiomyopathy
Source: MDPI journal article supplement (doi:10.3390/ijms22115494), 2021-05-23
Supplement: s1 [file s1]

1 Supplementary Figures

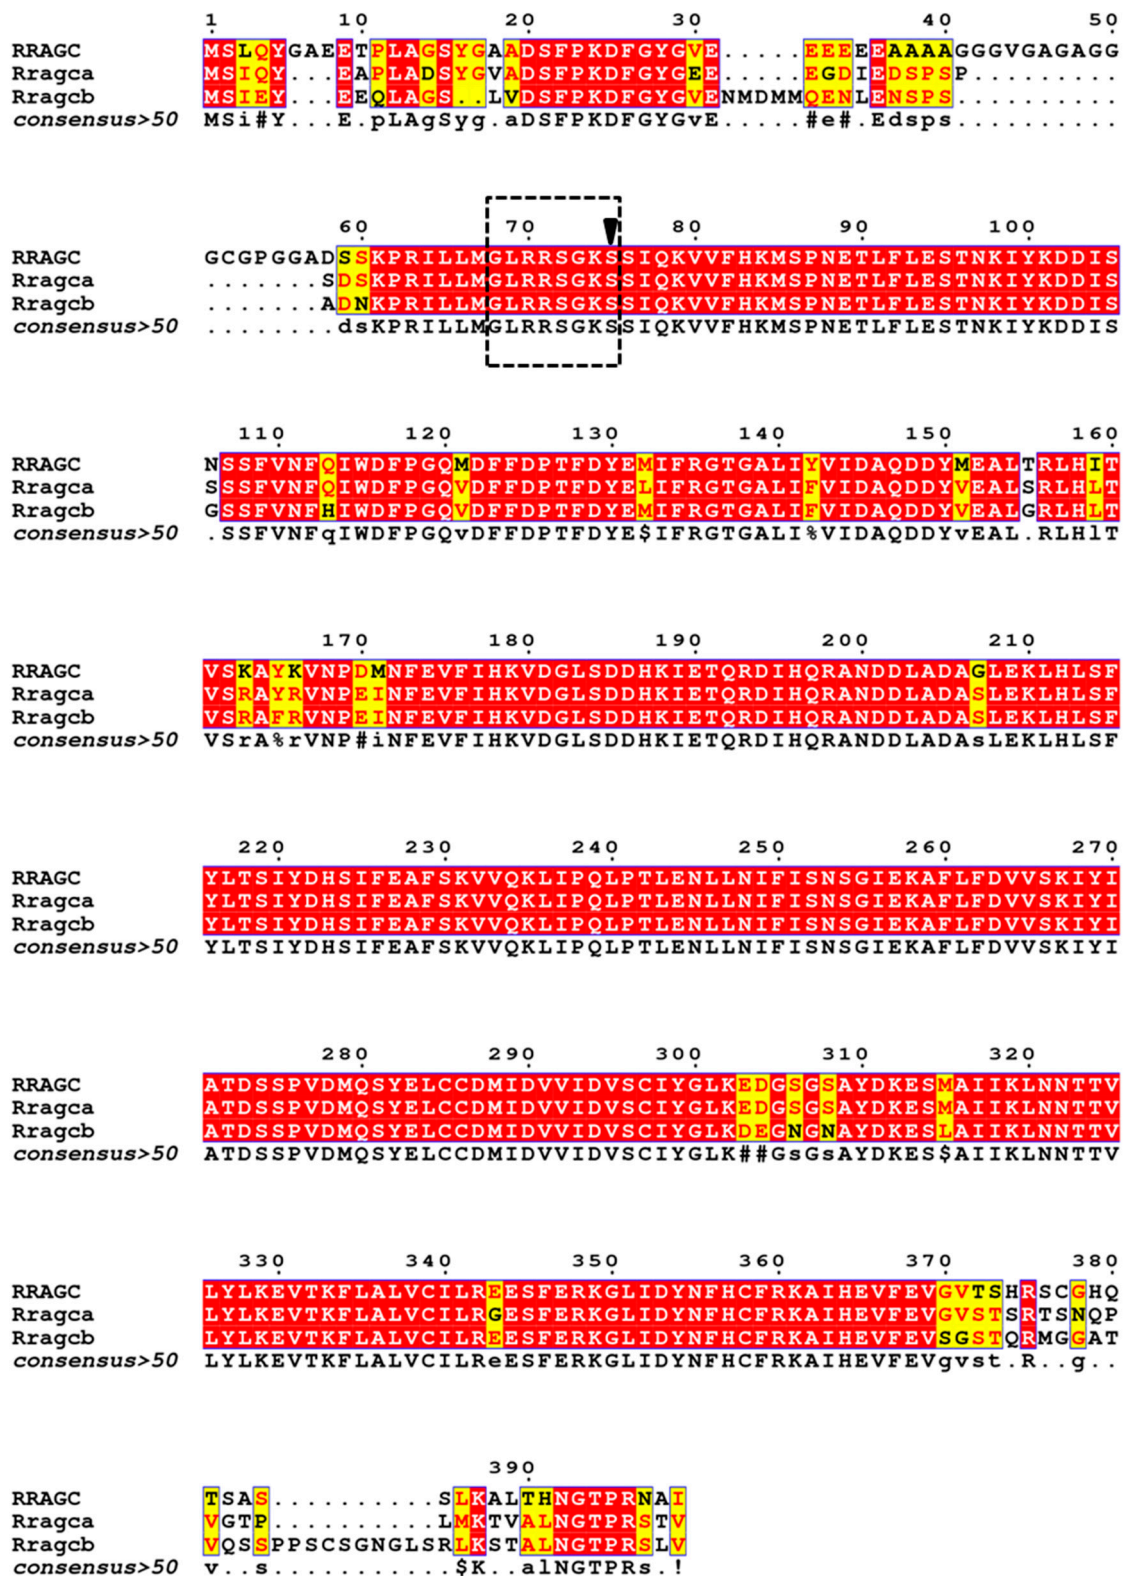

2

3 **Figure S1.** Alignment of the human RRAGC and zebrafish Rragc proteins. In zebrafish, there are two RRAGC  
 4 orthologs, *rragca* and *rragcb*, encoding proteins that share 75% and 71% amino acid identity to the human RRAGC,  
 5 respectively. S75 residue was indicated by an arrowhead and the P-loop motif was boxed.

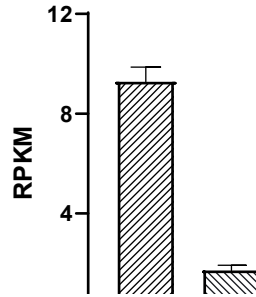

**Figure S2.** *rragca* is more predominantly expressed than *rragcb* in zebrafish heart. Shown are RNA-seq analysis of 6-months-old adult zebrafish. RPKM, reads per kilobase per million reads.

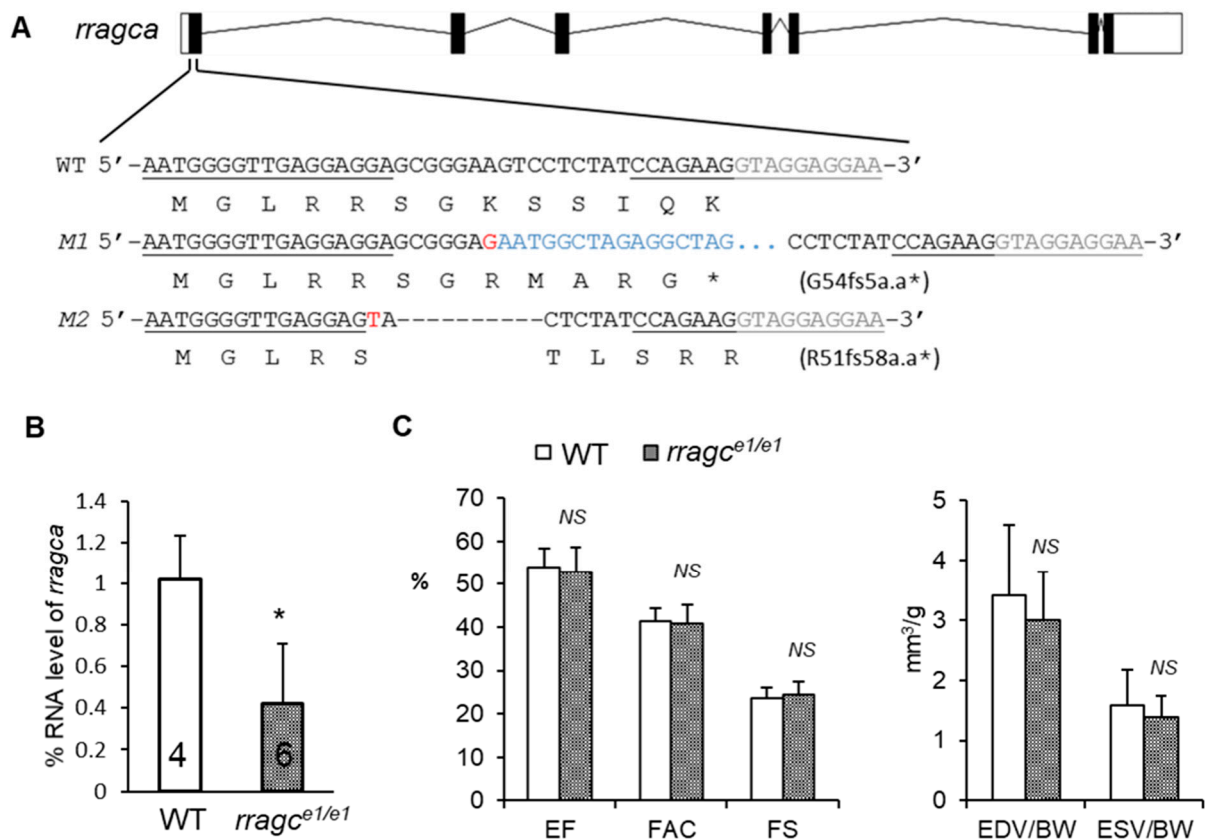

**Figure S3.** *rragca* knock outs do not manifest cardiac phenotypes. (A), Schematics of the 2 *rragca* mutant alleles generated using TALEN. The sequences in the 1<sup>st</sup> exon and intron (in grey color) that were targeted by the TALEN pairs are underlined. Dashed lines indicate deleted nucleotides; nucleotides in blue indicate insertional mutations; nucleotides in red indicate additional mutations. fs, frameshift. \*, premature translational stop codon. (B), *rragca* transcript level is reduced in *rragce1/e1* fish hearts. Shown are RT-qPCR analysis of the M1 allele. Data were normalized to *actb2* and expressed as fold change over WT, n=4, 6, Student's t test. (C), *rragca* knock-outs exhibits normal cardiac function. Shown are echocardiographic measurements for WT and *rragce1/e1* fish at 1 year of age (n =10,11). EF, ejection function. FS, fractional shortening. EDV, end-diastolic volume. ESV, end-systolic volume. BW, body weight. All values are shown as means ± SD. \*P<0.05 versus WT; NS, not significant versus WT by Student's t test.

A

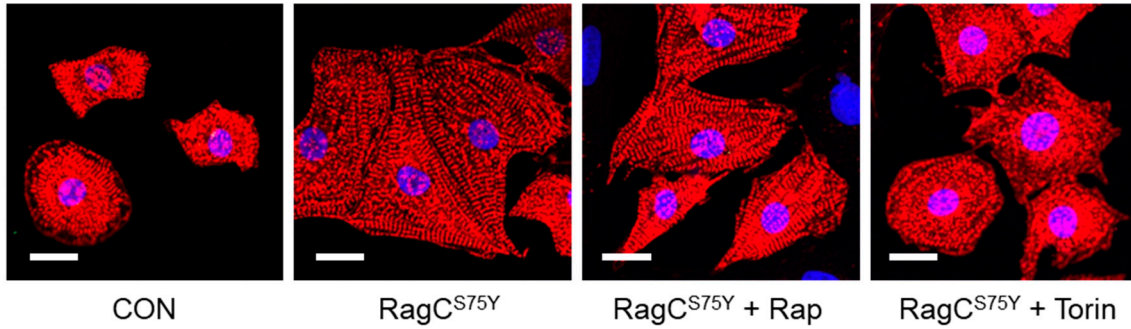

B

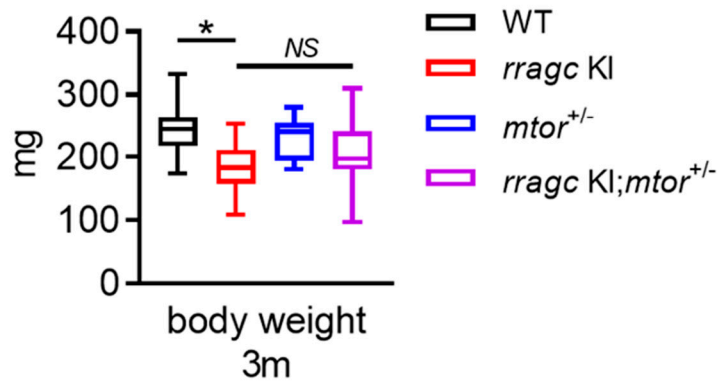

**Figure S4. Effects of mTOR inhibition on phenotypes of RagC S75Y cardiomyopathy.** (A). Representative confocal images of NRVCMs infected with recombinant adenoviruses: Ad:GFP (CON) or Ad:RagC S75Y (RagC<sup>S75Y</sup>) for 24 hours followed by rapamycin (100 nmol/L) or torin (10 nmol/L) or vehicle incubation for another 24 hours. Cells were stained with an anti-alpha-actinin antibody (red) and DAPI (blue). Scale bar, 20  $\mu$ m. (B). Zebrafish body weight of double mutants with their corresponding single mutants and wild type control at 3-month-old. N=19,18,9,15. Data are shown in boxplot (MIN to MAX). \* $P$ <0.05, NS, not significant versus *rragc* KI, one-way ANOVA.

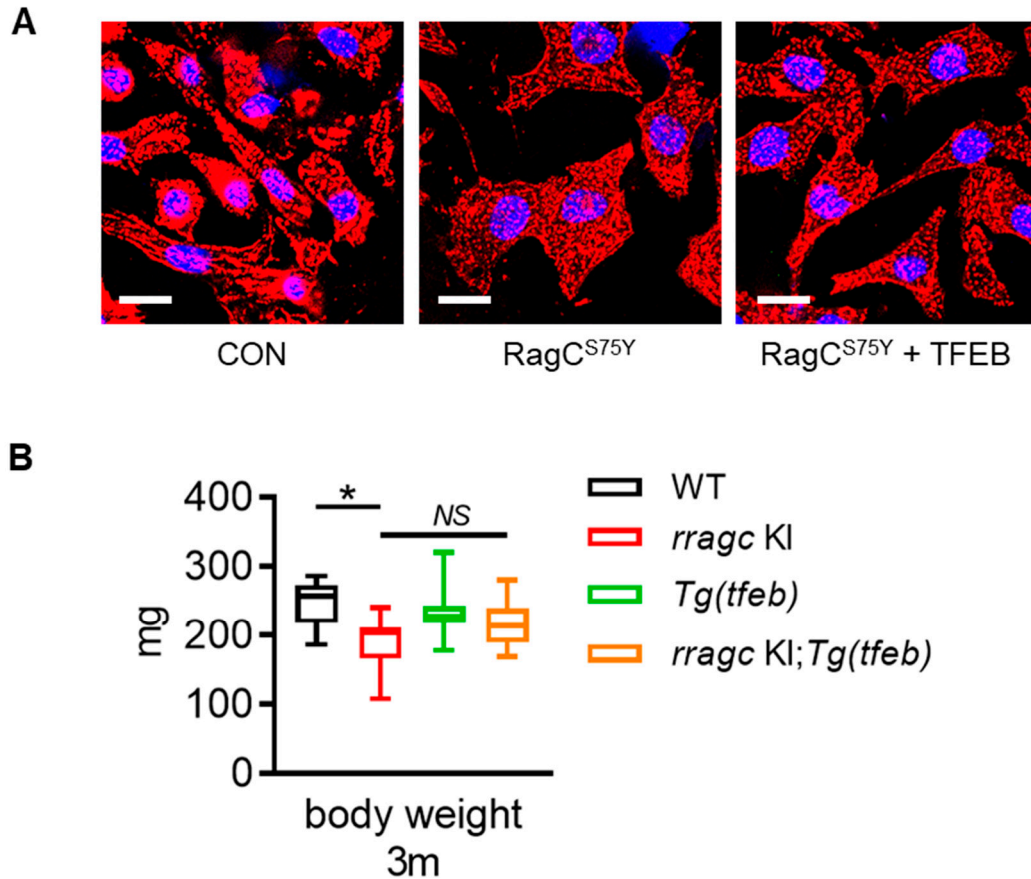

**Figure S5. Effects of TFEB activation on phenotypes of RagC S75Y cardiomyopathy.** (A). Representative confocal images of NRVCs infected with recombinant adenoviruses: Ad:GFP (CON), Ad:RagC S75Y (RagCS75Y) for 24 hours followed by rapamycin (100 nmol/L) or torin (10 nmol/L) or Ad:TFEB-FLAG (TFEB) for 48 hours. Cells were stained with an anti- $\alpha$ -actinin antibody (red) and DAPI (blue). Scale bar, 20  $\mu$ m. (B). Zebrafish body weight of double mutants with their corresponding single mutants and wild type control at 3-month-old. N=11,8,19,18. Data are shown in boxplot (MIN to MAX). \* $P$ <0.05, NS, not significant versus  $rragc$  KI, one-way ANOVA.

**Table S1. Primers for qPCR and genotyping**

| Gene                                          | Forward                  | Reverse                   |
|-----------------------------------------------|--------------------------|---------------------------|
| <i>Primers for quantitative Real Time-PCR</i> |                          |                           |
| <i>Nppa</i>                                   | CAACACAGATCTGATGGATTCA   | CCTCATCTTCTACCGGCATC      |
| <i>Nppb</i>                                   | GTCAGTCGCTTGGGCTGT       | CAGAGCTGGGGAAAGAAGAG      |
| <i>Mhc6</i>                                   | AGTGCTTCGTGCCTGATGA      | AACTTGGGTGGGTTCTGCT       |
| <i>Mhc7</i>                                   | GAGGAGAGGGCGGACATT       | ACTCTTCATTACAGGCCCTTG     |
| <i>Lamp1</i>                                  | TCTTCAGCGTGCAAGTCCAG     | ATGAGGACGATGAGGACCAG      |
| <i>Lamp2a</i>                                 | CCAAATTGGGATCCTAACCTAA   | TGGTGAAGCAGTGTTTATTAATTCC |
| <i>Map1lc3b</i>                               | TTTGTAAGGGCGGTTCTGAC     | CAGGTAGCAGGAAGCAGAGG      |
| <i>Rab7a</i>                                  | TTACTTCGAGACCAGTGCCAAGGA | TGTCCAGTTTGATGGGTTTCAGGGA |
| <i>Vps18</i>                                  | GCTCCGCATTGACTTGGG       | GCCTTCTGTCCATTGCGGT       |

|                               |                         |                            |
|-------------------------------|-------------------------|----------------------------|
| <i>18s</i>                    | GTAACCCGTTGAACCCCATTT   | CCATCCAATCGGTAGTAGCG       |
| <i>rragca</i>                 | TTGCCACTGACAGTTCACCG    | GCCACTGCCGTCCTCTTTTA       |
| <i>nppa</i>                   | GATGTACAAGCGCACACGTT    | TCTGATGCCTCTTCTGTTGC       |
| <i>nppb</i>                   | CATGGGTGTTTTAAAGTTTCTCC | CTTCAATATTTGCCGCCTTTAC     |
| <i>vmhc</i>                   | TCAGATGGCAGAGTTTGGAG    | GCTTCCTTTACAGTTACAGTCTTTC  |
| <i>vmhcl</i>                  | GCGATGCTGAAATGTCTGTT    | CAGTCACAGTCTTGCCCTCCT      |
| <i>tfeb</i>                   | TGCACCAACACACTTCCAGG    | GCATGGAGAGTGCATGTTTCG      |
| <i>lamp1</i>                  | CGGTCTGTCTCCTGGCACGCATG | GTCAGAGTAATGTTGTCCTCTGTGAG |
| <i>atg9a</i>                  | GCAGCAGCAGAAGGGATAGTGTG | TATTTCTCCCAGCAGCATACAGG    |
| <i>atg9b</i>                  | TCTCTTTGCCAATCGAGCCG    | CGCTCAGTGTCTTTTAGTGC       |
| <i>uvrag</i>                  | AACTTCCTAGAGCATGGGC     | AAATCCCACTTCGGATGCG        |
| <i>vps11</i>                  | CCCAGGGAAGAAAAAAGTCC    | GCCCTTTTCATACAAATACAGC     |
| <i>actb2</i>                  | GGTATCGTGATGGACTCTGG    | TCTCCTGCTCAAAGTCAAGG       |
| <i>gapdh</i>                  | CCACCCATGGAAAGTACAAG    | CTCTCTTTGCACCACCCTTA       |
| <i>Primers for genotyping</i> |                         |                            |
| <i>rragc</i>                  | GGACTCGTTTCCCAAAGATTTC  | CTCATTCACACAGCTATCTCAG     |

---
